# Supplementary material for: Soybean Aphid Infestation Induces Changes in Fatty Acid Metabolism in Soybean
Source: PubMed Central journal article supplement (PMC4684210; doi:10.1371/journal.pone.0145660), 2015-12-18
Supplement: pone.0145660.s001.pdf [file pone.0145660.s001.pdf]

**S1 Appendix:** MANOVA analysis statistics for the effect of SBA, SCN and BSR on fatty acid composition of soybean leaves

| Partial Correlation Coefficients from the Error SSCP Matrix / Prob >  r |                     |                     |                     |                     |                     |
|-------------------------------------------------------------------------|---------------------|---------------------|---------------------|---------------------|---------------------|
| DF = 24                                                                 | PALMITIC            | STEARIC             | OLEIC               | LINOLEIC            | LINOLENIC           |
| PALMITIC                                                                | 1.000000            | -0.474412<br>0.0166 | 0.021958<br>0.9170  | -0.558795<br>0.0037 | -0.891089<br><.0001 |
| STEARIC                                                                 | -0.474412<br>0.0166 | 1.000000            | 0.026526<br>0.8998  | 0.564007<br>0.0033  | 0.198873<br>0.3406  |
| OLEIC                                                                   | 0.021958<br>0.9170  | 0.026526<br>0.8998  | 1.000000            | -0.099350<br>0.6366 | -0.236337<br>0.2554 |
| LINOLEIC                                                                | -0.558795<br>0.0037 | 0.564007<br>0.0033  | -0.099350<br>0.6366 | 1.000000            | 0.196968<br>0.3453  |
| LINOLENIC                                                               | -0.891089<br><.0001 | 0.198873<br>0.3406  | -0.236337<br>0.2554 | 0.196968<br>0.3453  | 1.000000            |

| MANOVA Test Criteria and Exact F Statistics for the Hypothesis of No Overall Year Effect<br>H = Type III SSCP Matrix for Year<br>E = Error SSCP Matrix |            |         |        |        |        |
|--------------------------------------------------------------------------------------------------------------------------------------------------------|------------|---------|--------|--------|--------|
| S=1 M=1.5 N=9                                                                                                                                          |            |         |        |        |        |
| Statistic                                                                                                                                              | Value      | F Value | Num DF | Den DF | Pr > F |
| Wilks' Lambda                                                                                                                                          | 0.09625237 | 37.56   | 5      | 20     | <.0001 |
| Pillai's Trace                                                                                                                                         | 0.90374763 | 37.56   | 5      | 20     | <.0001 |
| Hotelling-Lawley Trace                                                                                                                                 | 9.38935443 | 37.56   | 5      | 20     | <.0001 |
| Roy's Greatest Root                                                                                                                                    | 9.38935443 | 37.56   | 5      | 20     | <.0001 |

| MANOVA Test Criteria and Exact F Statistics for the Hypothesis of No Overall Variety Effect<br>H = Type III SSCP Matrix for Variety<br>E = Error SSCP Matrix |            |         |        |        |        |
|--------------------------------------------------------------------------------------------------------------------------------------------------------------|------------|---------|--------|--------|--------|
| S=1 M=1.5 N=9                                                                                                                                                |            |         |        |        |        |
| Statistic                                                                                                                                                    | Value      | F Value | Num DF | Den DF | Pr > F |
| Wilks' Lambda                                                                                                                                                | 0.63551108 | 2.29    | 5      | 20     | 0.0841 |
| Pillai's Trace                                                                                                                                               | 0.36448892 | 2.29    | 5      | 20     | 0.0841 |
| Hotelling-Lawley Trace                                                                                                                                       | 0.57353668 | 2.29    | 5      | 20     | 0.0841 |
| Roy's Greatest Root                                                                                                                                          | 0.57353668 | 2.29    | 5      | 20     | 0.0841 |

MANOVA Test Criteria and Exact F Statistics for the Hypothesis of No Overall Year\*Variety Effect  
H = Type III SSCP Matrix for Year\*Variety  
E = Error SSCP Matrix

S=1 M=1.5 N=9

| Statistic              | Value      | F Value | Num DF | Den DF | Pr > F |
|------------------------|------------|---------|--------|--------|--------|
| Wilks' Lambda          | 0.74195386 | 1.39    | 5      | 20     | 0.2698 |
| Pillai's Trace         | 0.25804614 | 1.39    | 5      | 20     | 0.2698 |
| Hotelling-Lawley Trace | 0.34779271 | 1.39    | 5      | 20     | 0.2698 |
| Roy's Greatest Root    | 0.34779271 | 1.39    | 5      | 20     | 0.2698 |

MANOVA Test Criteria and F Approximations for the Hypothesis of No Overall Treatment Effect  
H = Type III SSCP Matrix for Treatment  
E = Error SSCP Matrix

S=5 M=-0.5 N=9

| Statistic              | Value      | F Value | Num DF | Den DF | Pr > F |
|------------------------|------------|---------|--------|--------|--------|
| Wilks' Lambda          | 0.10134790 | 2.58    | 25     | 75.799 | 0.0008 |
| Pillai's Trace         | 1.38364773 | 1.84    | 25     | 120    | 0.0161 |
| Hotelling-Lawley Trace | 4.90176236 | 3.71    | 25     | 40.48  | 0.0001 |
| Roy's Greatest Root    | 4.17607494 | 20.05   | 5      | 24     | <.0001 |

NOTE: F Statistic for Roy's Greatest Root is an upper bound.

MANOVA Test Criteria and F Approximations for the Hypothesis of No Overall Year\*Treatment Effect  
H = Type III SSCP Matrix for Year\*Treatment  
E = Error SSCP Matrix

S=5 M=-0.5 N=9

| Statistic              | Value      | F Value | Num DF | Den DF | Pr > F |
|------------------------|------------|---------|--------|--------|--------|
| Wilks' Lambda          | 0.23258822 | 1.46    | 25     | 75.799 | 0.1077 |
| Pillai's Trace         | 1.10487724 | 1.36    | 25     | 120    | 0.1380 |
| Hotelling-Lawley Trace | 2.05204084 | 1.55    | 25     | 40.48  | 0.1036 |
| Roy's Greatest Root    | 1.38181934 | 6.63    | 5      | 24     | 0.0005 |

NOTE: F Statistic for Roy's Greatest Root is an upper bound.

MANOVA Test Criteria and F Approximations for the Hypothesis of No Overall Variety\*Treatment Effect  
H = Type III SSCP Matrix for Variety\*Treatment  
E = Error SSCP Matrix

S=5 M=-0.5 N=9

| Statistic              | Value      | F Value | Num DF | Den DF | Pr > F |
|------------------------|------------|---------|--------|--------|--------|
| Wilks' Lambda          | 0.50270750 | 0.62    | 25     | 75.799 | 0.9126 |
| Pillai's Trace         | 0.60374412 | 0.66    | 25     | 120    | 0.8861 |
| Hotelling-Lawley Trace | 0.79084382 | 0.60    | 25     | 40.48  | 0.9116 |
| Roy's Greatest Root    | 0.43172492 | 2.07    | 5      | 24     | 0.1043 |

NOTE: F Statistic for Roy's Greatest Root is an upper bound.

MANOVA Test Criteria and F Approximations for the Hypothesis of No Overall Year\*Variety\*Treatme Effect  
H = Type III SSCP Matrix for Year\*Variety\*Treatme  
E = Error SSCP Matrix

S=5 M=-0.5 N=9

| Statistic              | Value      | F Value | Num DF | Den DF | Pr > F |
|------------------------|------------|---------|--------|--------|--------|
| Wilks' Lambda          | 0.40937009 | 0.82    | 25     | 75.799 | 0.7003 |
| Pillai's Trace         | 0.75101839 | 0.85    | 25     | 120    | 0.6732 |
| Hotelling-Lawley Trace | 1.08003953 | 0.82    | 25     | 40.48  | 0.6987 |
| Roy's Greatest Root    | 0.59368854 | 2.85    | 5      | 24     | 0.0370 |

NOTE: F Statistic for Roy's Greatest Root is an upper bound.
