# Supplementary material for: Soybean Aphid Infestation Induces Changes in Fatty Acid Metabolism in Soybean
Source: PubMed Central journal article supplement (PMC4684210; doi:10.1371/journal.pone.0145660), 2015-12-18
Supplement: pone.0145660.s002.pdf [file pone.0145660.s002.pdf]

**S2 Appendix:** ANOVA and means comparison for the effect of SBA, SCN and BSR on fatty acid composition of soybean leaves

**Leaf Palmitic acid (16:0)**

| Differences of Treatment Least Squares Means<br>Adjustment for Multiple Comparisons: Tukey |             |          |                |    |         |         |        |
|--------------------------------------------------------------------------------------------|-------------|----------|----------------|----|---------|---------|--------|
| Treatment                                                                                  | Treatment   | Estimate | Standard Error | DF | t Value | Pr >  t | Adj P  |
| BSR                                                                                        | Control     | 0.3129   | 3.6518         | 41 | 0.09    | 0.9321  | 1.0000 |
| BSR                                                                                        | SBA_250     | -1.4417  | 3.6518         | 41 | -0.39   | 0.6950  | 0.9987 |
| BSR                                                                                        | SBA_SCN_BSR | -15.8075 | 3.6518         | 41 | -4.33   | <.0001  | 0.0012 |
| BSR                                                                                        | SBA_UNL     | -22.3304 | 3.6518         | 41 | -6.11   | <.0001  | <.0001 |
| BSR                                                                                        | SCN         | 1.1588   | 3.6518         | 41 | 0.32    | 0.7526  | 0.9995 |
| Control                                                                                    | SBA_250     | -1.7546  | 3.6518         | 41 | -0.48   | 0.6334  | 0.9966 |
| Control                                                                                    | SBA_SCN_BSR | -16.1204 | 3.6518         | 41 | -4.41   | <.0001  | 0.0010 |
| Control                                                                                    | SBA_UNL     | -22.6433 | 3.6518         | 41 | -6.20   | <.0001  | <.0001 |
| Control                                                                                    | SCN         | 0.8458   | 3.6518         | 41 | 0.23    | 0.8180  | 0.9999 |
| SBA_250                                                                                    | SBA_SCN_BSR | -14.3658 | 3.6518         | 41 | -3.93   | 0.0003  | 0.0040 |
| SBA_250                                                                                    | SBA_UNL     | -20.8887 | 3.6518         | 41 | -5.72   | <.0001  | <.0001 |
| SBA_250                                                                                    | SCN         | 2.6004   | 3.6518         | 41 | 0.71    | 0.4804  | 0.9794 |
| SBA_SCN_BSR                                                                                | SBA_UNL     | -6.5229  | 3.6518         | 41 | -1.79   | 0.0815  | 0.4855 |
| SBA_SCN_BSR                                                                                | SCN         | 16.9663  | 3.6518         | 41 | 4.65    | <.0001  | 0.0005 |
| SBA_UNL                                                                                    | SCN         | 23.4892  | 3.6518         | 41 | 6.43    | <.0001  | <.0001 |

| Tukey Grouping for Treatment Least Squares Means (Alpha=0.05)  |          |   |
|----------------------------------------------------------------|----------|---|
| LS-means with the same letter are not significantly different. |          |   |
| Treatment                                                      | Estimate |   |
| SBA_UNL                                                        | 36.1267  | A |
|                                                                |          | A |
| SBA_SCN_BSR                                                    | 29.6038  | A |
|                                                                |          |   |
| SBA_250                                                        | 15.2379  | B |
|                                                                |          | B |
| BSR                                                            | 13.7963  | B |
|                                                                |          | B |
| Control                                                        | 13.4833  | B |
|                                                                |          | B |
| SCN                                                            | 12.6375  | B |

**Leaf Stearic acid (18:0)**

| Differences of Treatment Least Squares Means<br>Adjustment for Multiple Comparisons: Tukey |             |          |                |    |         |         |        |
|--------------------------------------------------------------------------------------------|-------------|----------|----------------|----|---------|---------|--------|
| Treatment                                                                                  | Treatment   | Estimate | Standard Error | DF | t Value | Pr >  t | Adj P  |
| BSR                                                                                        | Control     | -0.1092  | 0.4142         | 41 | -0.26   | 0.7935  | 0.9998 |
| BSR                                                                                        | SBA_250     | -0.09000 | 0.4142         | 41 | -0.22   | 0.8291  | 0.9999 |
| BSR                                                                                        | SBA_SCN_BSR | 0.4333   | 0.4142         | 41 | 1.05    | 0.3016  | 0.8993 |
| BSR                                                                                        | SBA_UNL     | 0.3958   | 0.4142         | 41 | 0.96    | 0.3449  | 0.9291 |
| BSR                                                                                        | SCN         | 0.1217   | 0.4142         | 41 | 0.29    | 0.7705  | 0.9997 |
| Control                                                                                    | SBA_250     | 0.01917  | 0.4142         | 41 | 0.05    | 0.9633  | 1.0000 |
| Control                                                                                    | SBA_SCN_BSR | 0.5425   | 0.4142         | 41 | 1.31    | 0.1976  | 0.7781 |
| Control                                                                                    | SBA_UNL     | 0.5050   | 0.4142         | 41 | 1.22    | 0.2298  | 0.8250 |
| Control                                                                                    | SCN         | 0.2308   | 0.4142         | 41 | 0.56    | 0.5804  | 0.9932 |
| SBA_250                                                                                    | SBA_SCN_BSR | 0.5233   | 0.4142         | 41 | 1.26    | 0.2136  | 0.8027 |
| SBA_250                                                                                    | SBA_UNL     | 0.4858   | 0.4142         | 41 | 1.17    | 0.2476  | 0.8470 |
| SBA_250                                                                                    | SCN         | 0.2117   | 0.4142         | 41 | 0.51    | 0.6121  | 0.9955 |
| SBA_SCN_BSR                                                                                | SBA_UNL     | -0.03750 | 0.4142         | 41 | -0.09   | 0.9283  | 1.0000 |
| SBA_SCN_BSR                                                                                | SCN         | -0.3117  | 0.4142         | 41 | -0.75   | 0.4561  | 0.9738 |
| SBA_UNL                                                                                    | SCN         | -0.2742  | 0.4142         | 41 | -0.66   | 0.5118  | 0.9851 |

| Tukey Grouping for Treatment Least Squares Means (Alpha=0.05)  |          |   |
|----------------------------------------------------------------|----------|---|
| LS-means with the same letter are not significantly different. |          |   |
| Treatment                                                      | Estimate |   |
| Control                                                        | 6.8371   | A |
|                                                                |          | A |
| SBA_250                                                        | 6.8179   | A |
|                                                                |          | A |
| BSR                                                            | 6.7279   | A |
|                                                                |          | A |
| SCN                                                            | 6.6063   | A |
|                                                                |          | A |
| SBA_UNL                                                        | 6.3321   | A |
|                                                                |          | A |
| SBA_SCN_BSR                                                    | 6.2946   | A |

## Leaf Oleic Acid

| Differences of Treatment Least Squares Means<br>Adjustment for Multiple Comparisons: Tukey |             |          |                |    |         |         |        |
|--------------------------------------------------------------------------------------------|-------------|----------|----------------|----|---------|---------|--------|
| Treatment                                                                                  | Treatment   | Estimate | Standard Error | DF | t Value | Pr >  t | Adj P  |
| BSR                                                                                        | Control     | -0.3446  | 0.9156         | 41 | -0.38   | 0.7086  | 0.9989 |
| BSR                                                                                        | SBA_250     | 0.7517   | 0.9156         | 41 | 0.82    | 0.4164  | 0.9619 |
| BSR                                                                                        | SBA_SCN_BSR | -1.5146  | 0.9156         | 41 | -1.65   | 0.1057  | 0.5687 |
| BSR                                                                                        | SBA_UNL     | -0.4608  | 0.9156         | 41 | -0.50   | 0.6174  | 0.9958 |
| BSR                                                                                        | SCN         | -0.3525  | 0.9156         | 41 | -0.39   | 0.7022  | 0.9988 |
| Control                                                                                    | SBA_250     | 1.0963   | 0.9156         | 41 | 1.20    | 0.2380  | 0.8356 |
| Control                                                                                    | SBA_SCN_BSR | -1.1700  | 0.9156         | 41 | -1.28   | 0.2085  | 0.7951 |
| Control                                                                                    | SBA_UNL     | -0.1163  | 0.9156         | 41 | -0.13   | 0.8996  | 1.0000 |
| Control                                                                                    | SCN         | -0.00792 | 0.9156         | 41 | -0.01   | 0.9931  | 1.0000 |
| SBA_250                                                                                    | SBA_SCN_BSR | -2.2663  | 0.9156         | 41 | -2.48   | 0.0175  | 0.1554 |
| SBA_250                                                                                    | SBA_UNL     | -1.2125  | 0.9156         | 41 | -1.32   | 0.1927  | 0.7700 |
| SBA_250                                                                                    | SCN         | -1.1042  | 0.9156         | 41 | -1.21   | 0.2347  | 0.8314 |
| SBA_SCN_BSR                                                                                | SBA_UNL     | 1.0537   | 0.9156         | 41 | 1.15    | 0.2564  | 0.8569 |
| SBA_SCN_BSR                                                                                | SCN         | 1.1621   | 0.9156         | 41 | 1.27    | 0.2115  | 0.7996 |
| SBA_UNL                                                                                    | SCN         | 0.1083   | 0.9156         | 41 | 0.12    | 0.9064  | 1.0000 |

| Tukey Grouping for Treatment Least Squares Means (Alpha=0.05)  |          |   |
|----------------------------------------------------------------|----------|---|
| LS-means with the same letter are not significantly different. |          |   |
| Treatment                                                      | Estimate |   |
| SBA_SCN_BSR                                                    | 6.1075   | A |
|                                                                |          | A |
| SBA_UNL                                                        | 5.0538   | A |
|                                                                |          | A |
| SCN                                                            | 4.9454   | A |
|                                                                |          | A |
| Control                                                        | 4.9375   | A |
|                                                                |          | A |
| BSR                                                            | 4.5929   | A |
|                                                                |          | A |
| SBA_250                                                        | 3.8413   | A |

## Leaf Linoleic acid

| Differences of Treatment Least Squares Means<br>Adjustment for Multiple Comparisons: Tukey |             |          |                |    |         |         |        |
|--------------------------------------------------------------------------------------------|-------------|----------|----------------|----|---------|---------|--------|
| Treatment                                                                                  | Treatment   | Estimate | Standard Error | DF | t Value | Pr >  t | Adj P  |
| BSR                                                                                        | Control     | 0.1037   | 1.4008         | 41 | 0.07    | 0.9413  | 1.0000 |
| BSR                                                                                        | SBA_250     | -1.3387  | 1.4008         | 41 | -0.96   | 0.3448  | 0.9291 |
| BSR                                                                                        | SBA_SCN_BSR | 3.6363   | 1.4008         | 41 | 2.60    | 0.0130  | 0.1213 |
| BSR                                                                                        | SBA_UNL     | 5.8717   | 1.4008         | 41 | 4.19    | 0.0001  | 0.0019 |
| BSR                                                                                        | SCN         | 0.4546   | 1.4008         | 41 | 0.32    | 0.7472  | 0.9995 |
| Control                                                                                    | SBA_250     | -1.4425  | 1.4008         | 41 | -1.03   | 0.3091  | 0.9051 |
| Control                                                                                    | SBA_SCN_BSR | 3.5325   | 1.4008         | 41 | 2.52    | 0.0157  | 0.1415 |
| Control                                                                                    | SBA_UNL     | 5.7679   | 1.4008         | 41 | 4.12    | 0.0002  | 0.0023 |
| Control                                                                                    | SCN         | 0.3508   | 1.4008         | 41 | 0.25    | 0.8035  | 0.9999 |
| SBA_250                                                                                    | SBA_SCN_BSR | 4.9750   | 1.4008         | 41 | 3.55    | 0.0010  | 0.0117 |
| SBA_250                                                                                    | SBA_UNL     | 7.2104   | 1.4008         | 41 | 5.15    | <.0001  | <.0001 |
| SBA_250                                                                                    | SCN         | 1.7933   | 1.4008         | 41 | 1.28    | 0.2077  | 0.7939 |
| SBA_SCN_BSR                                                                                | SBA_UNL     | 2.2354   | 1.4008         | 41 | 1.60    | 0.1182  | 0.6059 |
| SBA_SCN_BSR                                                                                | SCN         | -3.1817  | 1.4008         | 41 | -2.27   | 0.0284  | 0.2290 |
| SBA_UNL                                                                                    | SCN         | -5.4171  | 1.4008         | 41 | -3.87   | 0.0004  | 0.0049 |

| Tukey Grouping for Treatment Least Squares Means (Alpha=0.05)  |          |     |
|----------------------------------------------------------------|----------|-----|
| LS-means with the same letter are not significantly different. |          |     |
| Treatment                                                      | Estimate |     |
| SBA_250                                                        | 26.1733  | A   |
|                                                                |          | A   |
| BSR                                                            | 24.8346  | B A |
|                                                                |          | B A |
| Control                                                        | 24.7308  | B A |
|                                                                |          | B A |
| SCN                                                            | 24.3800  | B A |
|                                                                |          | B   |
| SBA_SCN_BSR                                                    | 21.1983  | B C |
|                                                                |          | C   |
| SBA_UNL                                                        | 18.9629  | C   |

## Leaf Linolenic Acid

| Differences of Treatment Least Squares Means<br>Adjustment for Multiple Comparisons: Tukey |             |          |                |    |         |         |        |
|--------------------------------------------------------------------------------------------|-------------|----------|----------------|----|---------|---------|--------|
| Treatment                                                                                  | Treatment   | Estimate | Standard Error | DF | t Value | Pr >  t | Adj P  |
| BSR                                                                                        | Control     | 0.07375  | 2.9790         | 41 | 0.02    | 0.9804  | 1.0000 |
| BSR                                                                                        | SBA_250     | 2.1492   | 2.9790         | 41 | 0.72    | 0.4747  | 0.9782 |
| BSR                                                                                        | SBA_SCN_BSR | 13.2667  | 2.9790         | 41 | 4.45    | <.0001  | 0.0009 |
| BSR                                                                                        | SBA_UNL     | 16.5338  | 2.9790         | 41 | 5.55    | <.0001  | <.0001 |
| BSR                                                                                        | SCN         | -1.3708  | 2.9790         | 41 | -0.46   | 0.6478  | 0.9972 |
| Control                                                                                    | SBA_250     | 2.0754   | 2.9790         | 41 | 0.70    | 0.4899  | 0.9813 |
| Control                                                                                    | SBA_SCN_BSR | 13.1929  | 2.9790         | 41 | 4.43    | <.0001  | 0.0009 |
| Control                                                                                    | SBA_UNL     | 16.4600  | 2.9790         | 41 | 5.53    | <.0001  | <.0001 |
| Control                                                                                    | SCN         | -1.4446  | 2.9790         | 41 | -0.48   | 0.6303  | 0.9965 |
| SBA_250                                                                                    | SBA_SCN_BSR | 11.1175  | 2.9790         | 41 | 3.73    | 0.0006  | 0.0071 |
| SBA_250                                                                                    | SBA_UNL     | 14.3846  | 2.9790         | 41 | 4.83    | <.0001  | 0.0003 |
| SBA_250                                                                                    | SCN         | -3.5200  | 2.9790         | 41 | -1.18   | 0.2442  | 0.8430 |
| SBA_SCN_BSR                                                                                | SBA_UNL     | 3.2671   | 2.9790         | 41 | 1.10    | 0.2792  | 0.8799 |
| SBA_SCN_BSR                                                                                | SCN         | -14.6375 | 2.9790         | 41 | -4.91   | <.0001  | 0.0002 |
| SBA_UNL                                                                                    | SCN         | -17.9046 | 2.9790         | 41 | -6.01   | <.0001  | <.0001 |

| Tukey Grouping for Treatment<br>Least Squares Means (Alpha=0.05)  |          |   |
|-------------------------------------------------------------------|----------|---|
| LS-means with the same letter<br>are not significantly different. |          |   |
| Treatment                                                         | Estimate |   |
| SCN                                                               | 51.4487  | A |
|                                                                   |          | A |
| BSR                                                               | 50.0779  | A |
|                                                                   |          | A |
| Control                                                           | 50.0042  | A |
|                                                                   |          | A |
| SBA_250                                                           | 47.9288  | A |
|                                                                   |          |   |
| SBA_SCN_BSR                                                       | 36.8113  | B |
|                                                                   |          | B |
| SBA_UNL                                                           | 33.5442  | B |
