# Supplementary material for: Soybean Aphid Infestation Induces Changes in Fatty Acid Metabolism in Soybean
Source: PubMed Central journal article supplement (PMC4684210; doi:10.1371/journal.pone.0145660), 2015-12-18
Supplement: pone.0145660.s003.pdf [file pone.0145660.s003.pdf]

**S3 Appendix:** MANOVA analysis statistics for the effect of SBA, SCN and BSR on fatty acid composition of soybean seeds

| Partial Correlation Coefficients from the Error SSCP Matrix / Prob >  r |                     |                     |                     |                     |                     |
|-------------------------------------------------------------------------|---------------------|---------------------|---------------------|---------------------|---------------------|
| DF = 96                                                                 | PAL                 | STE                 | OLE                 | LLE                 | LLN                 |
| PAL                                                                     | 1.000000<br>0.6144  | -0.051791<br>0.6144 | -0.304347<br>0.0024 | -0.083798<br>0.4145 | 0.110073<br>0.2831  |
| STE                                                                     | -0.051791<br>0.6144 | 1.000000            | 0.609382<br><.0001  | -0.790142<br><.0001 | -0.343054<br>0.0006 |
| OLE                                                                     | -0.304347<br>0.0024 | 0.609382<br><.0001  | 1.000000            | -0.809471<br><.0001 | -0.599459<br><.0001 |
| LLE                                                                     | -0.083798<br>0.4145 | -0.790142<br><.0001 | -0.809471<br><.0001 | 1.000000            | 0.218646<br>0.0314  |
| LLN                                                                     | 0.110073<br>0.2831  | -0.343054<br>0.0006 | -0.599459<br><.0001 | 0.218646<br>0.0314  | 1.000000            |

| MANOVA Test Criteria and Exact F Statistics for the Hypothesis of No Overall Year Effect<br>H = Type III SSCP Matrix for Year<br>E = Error SSCP Matrix<br><br>S=1 M=1.5 N=45 |            |         |        |        |        |
|------------------------------------------------------------------------------------------------------------------------------------------------------------------------------|------------|---------|--------|--------|--------|
| Statistic                                                                                                                                                                    | Value      | F Value | Num DF | Den DF | Pr > F |
| Wilks' Lambda                                                                                                                                                                | 0.16467160 | 93.34   | 5      | 92     | <.0001 |
| Pillai's Trace                                                                                                                                                               | 0.83532840 | 93.34   | 5      | 92     | <.0001 |
| Hotelling-Lawley Trace                                                                                                                                                       | 5.07269255 | 93.34   | 5      | 92     | <.0001 |
| Roy's Greatest Root                                                                                                                                                          | 5.07269255 | 93.34   | 5      | 92     | <.0001 |

| MANOVA Test Criteria and Exact F Statistics for the Hypothesis of No Overall Variety Effect<br>H = Type III SSCP Matrix for Variety<br>E = Error SSCP Matrix<br><br>S=1 M=1.5 N=45 |            |         |        |        |        |
|------------------------------------------------------------------------------------------------------------------------------------------------------------------------------------|------------|---------|--------|--------|--------|
| Statistic                                                                                                                                                                          | Value      | F Value | Num DF | Den DF | Pr > F |
| Wilks' Lambda                                                                                                                                                                      | 0.14206375 | 111.12  | 5      | 92     | <.0001 |
| Pillai's Trace                                                                                                                                                                     | 0.85793625 | 111.12  | 5      | 92     | <.0001 |
| Hotelling-Lawley Trace                                                                                                                                                             | 6.03909355 | 111.12  | 5      | 92     | <.0001 |
| Roy's Greatest Root                                                                                                                                                                | 6.03909355 | 111.12  | 5      | 92     | <.0001 |

MANOVA Test Criteria and Exact F Statistics for the Hypothesis of No Overall Year\*Variety Effect  
H = Type III SSCP Matrix for Year\*Variety  
E = Error SSCP Matrix

S=1 M=1.5 N=45

| Statistic              | Value      | F Value | Num DF | Den DF | Pr > F |
|------------------------|------------|---------|--------|--------|--------|
| Wilks' Lambda          | 0.82355970 | 3.94    | 5      | 92     | 0.0028 |
| Pillai's Trace         | 0.17644030 | 3.94    | 5      | 92     | 0.0028 |
| Hotelling-Lawley Trace | 0.21424106 | 3.94    | 5      | 92     | 0.0028 |
| Roy's Greatest Root    | 0.21424106 | 3.94    | 5      | 92     | 0.0028 |

MANOVA Test Criteria and F Approximations for the Hypothesis of No Overall Treatment Effect  
H = Type III SSCP Matrix for Treatment  
E = Error SSCP Matrix

S=5 M=-0.5 N=45

| Statistic              | Value      | F Value | Num DF | Den DF | Pr > F |
|------------------------|------------|---------|--------|--------|--------|
| Wilks' Lambda          | 0.35026604 | 4.48    | 25     | 343.27 | <.0001 |
| Pillai's Trace         | 0.75862736 | 3.43    | 25     | 480    | <.0001 |
| Hotelling-Lawley Trace | 1.55410139 | 5.65    | 25     | 216.6  | <.0001 |
| Roy's Greatest Root    | 1.34285198 | 25.78   | 5      | 96     | <.0001 |

NOTE: F Statistic for Roy's Greatest Root is an upper bound.

MANOVA Test Criteria and F Approximations for the Hypothesis of No Overall Year\*Treatment Effect  
H = Type III SSCP Matrix for Year\*Treatment  
E = Error SSCP Matrix

S=5 M=-0.5 N=45

| Statistic              | Value      | F Value | Num DF | Den DF | Pr > F |
|------------------------|------------|---------|--------|--------|--------|
| Wilks' Lambda          | 0.55010596 | 2.40    | 25     | 343.27 | 0.0003 |
| Pillai's Trace         | 0.51254923 | 2.19    | 25     | 480    | 0.0009 |
| Hotelling-Lawley Trace | 0.70748291 | 2.57    | 25     | 216.6  | 0.0001 |
| Roy's Greatest Root    | 0.51217609 | 9.83    | 5      | 96     | <.0001 |

NOTE: F Statistic for Roy's Greatest Root is an upper bound.

MANOVA Test Criteria and F Approximations for the Hypothesis of No Overall Variety\*Treatment Effect  
H = Type III SSCP Matrix for Variety\*Treatment  
E = Error SSCP Matrix

S=5 M=-0.5 N=45

| Statistic              | Value      | F Value | Num DF | Den DF | Pr > F |
|------------------------|------------|---------|--------|--------|--------|
| Wilks' Lambda          | 0.70028576 | 1.38    | 25     | 343.27 | 0.1077 |
| Pillai's Trace         | 0.33169150 | 1.36    | 25     | 480    | 0.1138 |
| Hotelling-Lawley Trace | 0.38405019 | 1.40    | 25     | 216.6  | 0.1074 |
| Roy's Greatest Root    | 0.23080725 | 4.43    | 5      | 96     | 0.0011 |

NOTE: F Statistic for Roy's Greatest Root is an upper bound.

MANOVA Test Criteria and F Approximations for the Hypothesis of No Overall Year\*Variety\*Treatme Effect  
H = Type III SSCP Matrix for Year\*Variety\*Treatme  
E = Error SSCP Matrix

S=5 M=-0.5 N=45

| Statistic              | Value      | F Value | Num DF | Den DF | Pr > F |
|------------------------|------------|---------|--------|--------|--------|
| Wilks' Lambda          | 0.65161516 | 1.68    | 25     | 343.27 | 0.0236 |
| Pillai's Trace         | 0.37865918 | 1.57    | 25     | 480    | 0.0395 |
| Hotelling-Lawley Trace | 0.48938988 | 1.78    | 25     | 216.6  | 0.0158 |
| Roy's Greatest Root    | 0.38200831 | 7.33    | 5      | 96     | <.0001 |

NOTE: F Statistic for Roy's Greatest Root is an upper bound.
