# Supplementary material for: Soybean Aphid Infestation Induces Changes in Fatty Acid Metabolism in Soybean
Source: PubMed Central journal article supplement (PMC4684210; doi:10.1371/journal.pone.0145660), 2015-12-18
Supplement: pone.0145660.s004.pdf [file pone.0145660.s004.pdf]

**S4 Appendix:** ANOVA and means comparison for the effect of SBA, SCN and BSR on fatty acid composition of soybean seeds

**Seed Palmitic acid (16:0)**

| Type III Tests of Fixed Effects |        |        |         |        |
|---------------------------------|--------|--------|---------|--------|
| Effect                          | Num DF | Den DF | F Value | Pr > F |
| Year                            | 1      | 96     | 31.62   | <.0001 |
| Variety                         | 1      | 96     | 310.90  | <.0001 |
| Year*Variety                    | 1      | 96     | 0.37    | 0.5440 |
| Treatment                       | 5      | 96     | 1.03    | 0.4050 |
| Year*Treatment                  | 5      | 96     | 0.36    | 0.8725 |
| Variety*Treatment               | 5      | 96     | 0.49    | 0.7828 |
| Year*Variety*Treatme            | 5      | 96     | 1.18    | 0.3246 |

**Seed Stearic acid (18:0)**

| Type III Tests of Fixed Effects |        |        |         |        |
|---------------------------------|--------|--------|---------|--------|
| Effect                          | Num DF | Den DF | F Value | Pr > F |
| Year                            | 1      | 96     | 73.62   | <.0001 |
| Variety                         | 1      | 96     | 165.35  | <.0001 |
| Year*Variety                    | 1      | 96     | 1.64    | 0.2040 |
| Treatment                       | 5      | 96     | 22.34   | <.0001 |
| Year*Treatment                  | 5      | 96     | 6.50    | <.0001 |
| Variety*Treatment               | 5      | 96     | 1.95    | 0.0931 |
| Year*Variety*Treatme            | 5      | 96     | 3.17    | 0.0108 |

| Simple Differences of Year*Variety*Treatme Least Squares Means<br>Adjustment for Multiple Comparisons: Tukey |             |             |          |                |    |         |         |        |
|--------------------------------------------------------------------------------------------------------------|-------------|-------------|----------|----------------|----|---------|---------|--------|
| Slice                                                                                                        | Treatment   | Treatment   | Estimate | Standard Error | DF | t Value | Pr >  t | Adj P  |
| Year 1 Variety Resistant                                                                                     | BSR         | CONTROL     | -0.1180  | 0.2731         | 96 | -0.43   | 0.6667  | 0.9980 |
| Year 1 Variety Resistant                                                                                     | BSR         | SBA_250     | 0.1720   | 0.2731         | 96 | 0.63    | 0.5304  | 0.9885 |
| Year 1 Variety Resistant                                                                                     | BSR         | SBA_SCN_BSR | -0.4480  | 0.2731         | 96 | -1.64   | 0.1042  | 0.5742 |
| Year 1 Variety Resistant                                                                                     | BSR         | SBA_UNL     | -0.3880  | 0.2731         | 96 | -1.42   | 0.1587  | 0.7145 |
| Year 1 Variety Resistant                                                                                     | BSR         | SCN         | 0.1300   | 0.2731         | 96 | 0.48    | 0.6352  | 0.9969 |
| Year 1 Variety Resistant                                                                                     | CONTROL     | SBA_250     | 0.2900   | 0.2731         | 96 | 1.06    | 0.2910  | 0.8952 |
| Year 1 Variety Resistant                                                                                     | CONTROL     | SBA_SCN_BSR | -0.3300  | 0.2731         | 96 | -1.21   | 0.2299  | 0.8319 |
| Year 1 Variety Resistant                                                                                     | CONTROL     | SBA_UNL     | -0.2700  | 0.2731         | 96 | -0.99   | 0.3254  | 0.9205 |
| Year 1 Variety Resistant                                                                                     | CONTROL     | SCN         | 0.2480   | 0.2731         | 96 | 0.91    | 0.3661  | 0.9436 |
| Year 1 Variety Resistant                                                                                     | SBA_250     | SBA_SCN_BSR | -0.6200  | 0.2731         | 96 | -2.27   | 0.0254  | 0.2166 |
| Year 1 Variety Resistant                                                                                     | SBA_250     | SBA_UNL     | -0.5600  | 0.2731         | 96 | -2.05   | 0.0431  | 0.3223 |
| Year 1 Variety Resistant                                                                                     | SBA_250     | SCN         | -0.04200 | 0.2731         | 96 | -0.15   | 0.8781  | 1.0000 |
| Year 1 Variety Resistant                                                                                     | SBA_SCN_BSR | SBA_UNL     | 0.06000  | 0.2731         | 96 | 0.22    | 0.8266  | 0.9999 |
| Year 1 Variety Resistant                                                                                     | SBA_SCN_BSR | SCN         | 0.5780   | 0.2731         | 96 | 2.12    | 0.0369  | 0.2878 |
| Year 1 Variety Resistant                                                                                     | SBA_UNL     | SCN         | 0.5180   | 0.2731         | 96 | 1.90    | 0.0609  | 0.4106 |

| Tukey Grouping for Year*Variety*Treatme Least Squares Means Slice (Alpha=0.05) |             |          |   |
|--------------------------------------------------------------------------------|-------------|----------|---|
| LS-means with the same letter are not significantly different.                 |             |          |   |
| Slice                                                                          | Treatment   | Estimate |   |
| Year 1 Variety Resistant                                                       | SBA_SCN_BSR | 5.1480   | A |
| Year 1 Variety Resistant                                                       |             |          | A |
| Year 1 Variety Resistant                                                       | SBA_UNL     | 5.0880   | A |
| Year 1 Variety Resistant                                                       |             |          | A |
| Year 1 Variety Resistant                                                       | CONTROL     | 4.8180   | A |
| Year 1 Variety Resistant                                                       |             |          | A |
| Year 1 Variety Resistant                                                       | BSR         | 4.7000   | A |
| Year 1 Variety Resistant                                                       |             |          | A |
| Year 1 Variety Resistant                                                       | SCN         | 4.5700   | A |
| Year 1 Variety Resistant                                                       |             |          | A |
| Year 1 Variety Resistant                                                       | SBA_250     | 4.5280   | A |

| Simple Differences of Year*Variety*Treatme Least Squares Means<br>Adjustment for Multiple Comparisons: Tukey |             |             |          |                |    |         |         |        |
|--------------------------------------------------------------------------------------------------------------|-------------|-------------|----------|----------------|----|---------|---------|--------|
| Slice                                                                                                        | Treatment   | Treatment   | Estimate | Standard Error | DF | t Value | Pr >  t | Adj P  |
| Year 1 Variety Susceptible                                                                                   | BSR         | CONTROL     | -0.00800 | 0.2731         | 96 | -0.03   | 0.9767  | 1.0000 |
| Year 1 Variety Susceptible                                                                                   | BSR         | SBA_250     | -0.1180  | 0.2731         | 96 | -0.43   | 0.6667  | 0.9980 |
| Year 1 Variety Susceptible                                                                                   | BSR         | SBA_SCN_BSR | -0.5340  | 0.2731         | 96 | -1.96   | 0.0535  | 0.3757 |
| Year 1 Variety Susceptible                                                                                   | BSR         | SBA_UNL     | -0.7260  | 0.2731         | 96 | -2.66   | 0.0092  | 0.0935 |
| Year 1 Variety Susceptible                                                                                   | BSR         | SCN         | -0.1360  | 0.2731         | 96 | -0.50   | 0.6197  | 0.9961 |
| Year 1 Variety Susceptible                                                                                   | CONTROL     | SBA_250     | -0.1100  | 0.2731         | 96 | -0.40   | 0.6880  | 0.9986 |
| Year 1 Variety Susceptible                                                                                   | CONTROL     | SBA_SCN_BSR | -0.5260  | 0.2731         | 96 | -1.93   | 0.0571  | 0.3930 |
| Year 1 Variety Susceptible                                                                                   | CONTROL     | SBA_UNL     | -0.7180  | 0.2731         | 96 | -2.63   | 0.0100  | 0.1002 |
| Year 1 Variety Susceptible                                                                                   | CONTROL     | SCN         | -0.1280  | 0.2731         | 96 | -0.47   | 0.6404  | 0.9971 |
| Year 1 Variety Susceptible                                                                                   | SBA_250     | SBA_SCN_BSR | -0.4160  | 0.2731         | 96 | -1.52   | 0.1310  | 0.6504 |
| Year 1 Variety Susceptible                                                                                   | SBA_250     | SBA_UNL     | -0.6080  | 0.2731         | 96 | -2.23   | 0.0283  | 0.2356 |
| Year 1 Variety Susceptible                                                                                   | SBA_250     | SCN         | -0.01800 | 0.2731         | 96 | -0.07   | 0.9476  | 1.0000 |
| Year 1 Variety Susceptible                                                                                   | SBA_SCN_BSR | SBA_UNL     | -0.1920  | 0.2731         | 96 | -0.70   | 0.4838  | 0.9812 |
| Year 1 Variety Susceptible                                                                                   | SBA_SCN_BSR | SCN         | 0.3980   | 0.2731         | 96 | 1.46    | 0.1483  | 0.6920 |
| Year 1 Variety Susceptible                                                                                   | SBA_UNL     | SCN         | 0.5900   | 0.2731         | 96 | 2.16    | 0.0332  | 0.2662 |

| Tukey Grouping for Year*Variety*Treatme Least Squares Means Slice (Alpha=0.05) |             |          |   |
|--------------------------------------------------------------------------------|-------------|----------|---|
| LS-means with the same letter are not significantly different.                 |             |          |   |
| Slice                                                                          | Treatment   | Estimate |   |
| Year 1 Variety Susceptible                                                     | SBA_UNL     | 4.3680   | A |
| Year 1 Variety Susceptible                                                     |             |          | A |
| Year 1 Variety Susceptible                                                     | SBA_SCN_BSR | 4.1760   | A |
| Year 1 Variety Susceptible                                                     |             |          | A |
| Year 1 Variety Susceptible                                                     | SCN         | 3.7780   | A |
| Year 1 Variety Susceptible                                                     |             |          | A |
| Year 1 Variety Susceptible                                                     | SBA_250     | 3.7600   | A |
| Year 1 Variety Susceptible                                                     |             |          | A |
| Year 1 Variety Susceptible                                                     | CONTROL     | 3.6500   | A |
| Year 1 Variety Susceptible                                                     |             |          | A |
| Year 1 Variety Susceptible                                                     | BSR         | 3.6420   | A |

| Simple Differences of Year*Variety*Treatme Least Squares Means<br>Adjustment for Multiple Comparisons: Tukey |             |             |          |                |    |         |         |        |
|--------------------------------------------------------------------------------------------------------------|-------------|-------------|----------|----------------|----|---------|---------|--------|
| Slice                                                                                                        | Treatment   | Treatment   | Estimate | Standard Error | DF | t Value | Pr >  t | Adj P  |
| Year 2 Variety Resistant                                                                                     | BSR         | CONTROL     | 0.2120   | 0.2731         | 96 | 0.78    | 0.4395  | 0.9709 |
| Year 2 Variety Resistant                                                                                     | BSR         | SBA_250     | 0.09200  | 0.2731         | 96 | 0.34    | 0.7370  | 0.9994 |
| Year 2 Variety Resistant                                                                                     | BSR         | SBA_SCN_BSR | -0.1500  | 0.2731         | 96 | -0.55   | 0.5841  | 0.9939 |
| Year 2 Variety Resistant                                                                                     | BSR         | SBA_UNL     | -2.2540  | 0.2731         | 96 | -8.25   | <.0001  | <.0001 |
| Year 2 Variety Resistant                                                                                     | BSR         | SCN         | 0.1800   | 0.2731         | 96 | 0.66    | 0.5114  | 0.9859 |
| Year 2 Variety Resistant                                                                                     | CONTROL     | SBA_250     | -0.1200  | 0.2731         | 96 | -0.44   | 0.6614  | 0.9979 |
| Year 2 Variety Resistant                                                                                     | CONTROL     | SBA_SCN_BSR | -0.3620  | 0.2731         | 96 | -1.33   | 0.1882  | 0.7703 |
| Year 2 Variety Resistant                                                                                     | CONTROL     | SBA_UNL     | -2.4660  | 0.2731         | 96 | -9.03   | <.0001  | <.0001 |
| Year 2 Variety Resistant                                                                                     | CONTROL     | SCN         | -0.03200 | 0.2731         | 96 | -0.12   | 0.9070  | 1.0000 |
| Year 2 Variety Resistant                                                                                     | SBA_250     | SBA_SCN_BSR | -0.2420  | 0.2731         | 96 | -0.89   | 0.3778  | 0.9490 |
| Year 2 Variety Resistant                                                                                     | SBA_250     | SBA_UNL     | -2.3460  | 0.2731         | 96 | -8.59   | <.0001  | <.0001 |
| Year 2 Variety Resistant                                                                                     | SBA_250     | SCN         | 0.08800  | 0.2731         | 96 | 0.32    | 0.7480  | 0.9995 |
| Year 2 Variety Resistant                                                                                     | SBA_SCN_BSR | SBA_UNL     | -2.1040  | 0.2731         | 96 | -7.70   | <.0001  | <.0001 |
| Year 2 Variety Resistant                                                                                     | SBA_SCN_BSR | SCN         | 0.3300   | 0.2731         | 96 | 1.21    | 0.2299  | 0.8319 |
| Year 2 Variety Resistant                                                                                     | SBA_UNL     | SCN         | 2.4340   | 0.2731         | 96 | 8.91    | <.0001  | <.0001 |

| Tukey Grouping for Year*Variety*Treatme Least Squares Means Slice (Alpha=0.05) |             |          |   |
|--------------------------------------------------------------------------------|-------------|----------|---|
| LS-means with the same letter are not significantly different.                 |             |          |   |
| Slice                                                                          | Treatment   | Estimate |   |
| Year 2 Variety Resistant                                                       | SBA_UNL     | 7.5200   | A |
| Year 2 Variety Resistant                                                       |             |          |   |
| Year 2 Variety Resistant                                                       | SBA_SCN_BSR | 5.4160   | B |
| Year 2 Variety Resistant                                                       |             |          | B |
| Year 2 Variety Resistant                                                       | BSR         | 5.2660   | B |
| Year 2 Variety Resistant                                                       |             |          | B |
| Year 2 Variety Resistant                                                       | SBA_250     | 5.1740   | B |
| Year 2 Variety Resistant                                                       |             |          | B |
| Year 2 Variety Resistant                                                       | SCN         | 5.0860   | B |
| Year 2 Variety Resistant                                                       |             |          | B |
| Year 2 Variety Resistant                                                       | CONTROL     | 5.0540   | B |

| Simple Differences of Year*Variety*Treatme Least Squares Means<br>Adjustment for Multiple Comparisons: Tukey |             |             |          |                |    |         |         |        |
|--------------------------------------------------------------------------------------------------------------|-------------|-------------|----------|----------------|----|---------|---------|--------|
| Slice                                                                                                        | Treatment   | Treatment   | Estimate | Standard Error | DF | t Value | Pr >  t | Adj P  |
| Year 2 Variety Susceptible                                                                                   | BSR         | CONTROL     | 0.1340   | 0.2731         | 96 | 0.49    | 0.6248  | 0.9964 |
| Year 2 Variety Susceptible                                                                                   | BSR         | SBA_250     | -0.2360  | 0.2731         | 96 | -0.86   | 0.3897  | 0.9541 |
| Year 2 Variety Susceptible                                                                                   | BSR         | SBA_SCN_BSR | -0.4580  | 0.2731         | 96 | -1.68   | 0.0968  | 0.5503 |
| Year 2 Variety Susceptible                                                                                   | BSR         | SBA_UNL     | -0.9980  | 0.2731         | 96 | -3.65   | 0.0004  | 0.0055 |
| Year 2 Variety Susceptible                                                                                   | BSR         | SCN         | 0.1340   | 0.2731         | 96 | 0.49    | 0.6248  | 0.9964 |
| Year 2 Variety Susceptible                                                                                   | CONTROL     | SBA_250     | -0.3700  | 0.2731         | 96 | -1.35   | 0.1787  | 0.7536 |
| Year 2 Variety Susceptible                                                                                   | CONTROL     | SBA_SCN_BSR | -0.5920  | 0.2731         | 96 | -2.17   | 0.0327  | 0.2626 |
| Year 2 Variety Susceptible                                                                                   | CONTROL     | SBA_UNL     | -1.1320  | 0.2731         | 96 | -4.14   | <.0001  | 0.0010 |
| Year 2 Variety Susceptible                                                                                   | CONTROL     | SCN         | -432E-16 | 0.2731         | 96 | -0.00   | 1.0000  | 1.0000 |
| Year 2 Variety Susceptible                                                                                   | SBA_250     | SBA_SCN_BSR | -0.2220  | 0.2731         | 96 | -0.81   | 0.4183  | 0.9645 |
| Year 2 Variety Susceptible                                                                                   | SBA_250     | SBA_UNL     | -0.7620  | 0.2731         | 96 | -2.79   | 0.0064  | 0.0678 |
| Year 2 Variety Susceptible                                                                                   | SBA_250     | SCN         | 0.3700   | 0.2731         | 96 | 1.35    | 0.1787  | 0.7536 |
| Year 2 Variety Susceptible                                                                                   | SBA_SCN_BSR | SBA_UNL     | -0.5400  | 0.2731         | 96 | -1.98   | 0.0509  | 0.3630 |
| Year 2 Variety Susceptible                                                                                   | SBA_SCN_BSR | SCN         | 0.5920   | 0.2731         | 96 | 2.17    | 0.0327  | 0.2626 |
| Year 2 Variety Susceptible                                                                                   | SBA_UNL     | SCN         | 1.1320   | 0.2731         | 96 | 4.14    | <.0001  | 0.0010 |

| Tukey Grouping for Year*Variety*Treatme Least Squares Means Slice (Alpha=0.05) |             |          |     |
|--------------------------------------------------------------------------------|-------------|----------|-----|
| LS-means with the same letter are not significantly different.                 |             |          |     |
| Slice                                                                          | Treatment   | Estimate |     |
| Year 2 Variety Susceptible                                                     | SBA_UNL     | 5.2320   | A   |
| Year 2 Variety Susceptible                                                     |             |          | A   |
| Year 2 Variety Susceptible                                                     | SBA_SCN_BSR | 4.6920   | B A |
| Year 2 Variety Susceptible                                                     |             |          | B A |
| Year 2 Variety Susceptible                                                     | SBA_250     | 4.4700   | B A |
| Year 2 Variety Susceptible                                                     |             |          | B   |
| Year 2 Variety Susceptible                                                     | BSR         | 4.2340   | B   |
| Year 2 Variety Susceptible                                                     |             |          | B   |
| Year 2 Variety Susceptible                                                     | SCN         | 4.1000   | B   |
| Year 2 Variety Susceptible                                                     |             |          | B   |
| Year 2 Variety Susceptible                                                     | CONTROL     | 4.1000   | B   |



**Seed Oleic acid (18:1)**

| Type III Tests of Fixed Effects |        |        |         |        |
|---------------------------------|--------|--------|---------|--------|
| Effect                          | Num DF | Den DF | F Value | Pr > F |
| Year                            | 1      | 96     | 143.52  | <.0001 |
| Variety                         | 1      | 96     | 3.18    | 0.0775 |
| Year*Variety                    | 1      | 96     | 1.87    | 0.1743 |
| Treatment                       | 5      | 96     | 7.28    | <.0001 |
| Year*Treatment                  | 5      | 96     | 2.33    | 0.0481 |
| Variety*Treatment               | 5      | 96     | 0.61    | 0.6924 |
| Year*Variety*Treatme            | 5      | 96     | 2.24    | 0.0567 |

| Differences of Treatment Least Squares Means<br>Adjustment for Multiple Comparisons: Tukey |             |          |                |    |         |         |        |
|--------------------------------------------------------------------------------------------|-------------|----------|----------------|----|---------|---------|--------|
| Treatment                                                                                  | Treatment   | Estimate | Standard Error | DF | t Value | Pr >  t | Adj P  |
| BSR                                                                                        | CONTROL     | 0.2365   | 0.3358         | 96 | 0.70    | 0.4830  | 0.9810 |
| BSR                                                                                        | SBA_250     | 0.1445   | 0.3358         | 96 | 0.43    | 0.6679  | 0.9981 |
| BSR                                                                                        | SBA_SCN_BSR | -0.5175  | 0.3358         | 96 | -1.54   | 0.1266  | 0.6388 |
| BSR                                                                                        | SBA_UNL     | -1.4705  | 0.3358         | 96 | -4.38   | <.0001  | 0.0004 |
| BSR                                                                                        | SCN         | -0.04900 | 0.3358         | 96 | -0.15   | 0.8843  | 1.0000 |
| CONTROL                                                                                    | SBA_250     | -0.09200 | 0.3358         | 96 | -0.27   | 0.7847  | 0.9998 |
| CONTROL                                                                                    | SBA_SCN_BSR | -0.7540  | 0.3358         | 96 | -2.25   | 0.0270  | 0.2272 |
| CONTROL                                                                                    | SBA_UNL     | -1.7070  | 0.3358         | 96 | -5.08   | <.0001  | <.0001 |
| CONTROL                                                                                    | SCN         | -0.2855  | 0.3358         | 96 | -0.85   | 0.3973  | 0.9571 |
| SBA_250                                                                                    | SBA_SCN_BSR | -0.6620  | 0.3358         | 96 | -1.97   | 0.0516  | 0.3664 |
| SBA_250                                                                                    | SBA_UNL     | -1.6150  | 0.3358         | 96 | -4.81   | <.0001  | <.0001 |
| SBA_250                                                                                    | SCN         | -0.1935  | 0.3358         | 96 | -0.58   | 0.5658  | 0.9924 |
| SBA_SCN_BSR                                                                                | SBA_UNL     | -0.9530  | 0.3358         | 96 | -2.84   | 0.0055  | 0.0600 |
| SBA_SCN_BSR                                                                                | SCN         | 0.4685   | 0.3358         | 96 | 1.40    | 0.1662  | 0.7299 |
| SBA_UNL                                                                                    | SCN         | 1.4215   | 0.3358         | 96 | 4.23    | <.0001  | 0.0007 |

| Tukey Grouping for Treatment Least Squares Means (Alpha=0.05)  |          |     |
|----------------------------------------------------------------|----------|-----|
| LS-means with the same letter are not significantly different. |          |     |
| Treatment                                                      | Estimate |     |
| SBA_UNL                                                        | 22.4235  | A   |
|                                                                |          | A   |
| SBA_SCN_BSR                                                    | 21.4705  | B A |
|                                                                |          | B   |
| SCN                                                            | 21.0020  | B   |
|                                                                |          | B   |
| BSR                                                            | 20.9530  | B   |
|                                                                |          | B   |
| SBA_250                                                        | 20.8085  | B   |
|                                                                |          | B   |
| CONTROL                                                        | 20.7165  | B   |

**Seed Linoleic acid (18:2)**

| Type III Tests of Fixed Effects |        |        |         |        |
|---------------------------------|--------|--------|---------|--------|
| Effect                          | Num DF | Den DF | F Value | Pr > F |
| Year                            | 1      | 96     | 10.26   | 0.0018 |
| Variety                         | 1      | 96     | 220.25  | <.0001 |
| Year*Variety                    | 1      | 96     | 1.91    | 0.1707 |
| Treatment                       | 5      | 96     | 10.83   | <.0001 |
| Year*Treatment                  | 5      | 96     | 2.72    | 0.0240 |
| Variety*Treatment               | 5      | 96     | 1.38    | 0.2393 |
| Year*Variety*Treatme            | 5      | 96     | 2.53    | 0.0342 |

| Differences of Treatment Least Squares Means<br>Adjustment for Multiple Comparisons: Tukey |             |          |                |    |         |         |        |
|--------------------------------------------------------------------------------------------|-------------|----------|----------------|----|---------|---------|--------|
| Treatment                                                                                  | Treatment   | Estimate | Standard Error | DF | t Value | Pr >  t | Adj P  |
| BSR                                                                                        | CONTROL     | -0.1095  | 0.3557         | 96 | -0.31   | 0.7589  | 0.9996 |
| BSR                                                                                        | SBA_250     | -0.08800 | 0.3557         | 96 | -0.25   | 0.8051  | 0.9999 |
| BSR                                                                                        | SBA_SCN_BSR | 0.5470   | 0.3557         | 96 | 1.54    | 0.1274  | 0.6409 |
| BSR                                                                                        | SBA_UNL     | 2.0135   | 0.3557         | 96 | 5.66    | <.0001  | <.0001 |
| BSR                                                                                        | SCN         | 0.02050  | 0.3557         | 96 | 0.06    | 0.9542  | 1.0000 |
| CONTROL                                                                                    | SBA_250     | 0.02150  | 0.3557         | 96 | 0.06    | 0.9519  | 1.0000 |
| CONTROL                                                                                    | SBA_SCN_BSR | 0.6565   | 0.3557         | 96 | 1.85    | 0.0680  | 0.4419 |
| CONTROL                                                                                    | SBA_UNL     | 2.1230   | 0.3557         | 96 | 5.97    | <.0001  | <.0001 |
| CONTROL                                                                                    | SCN         | 0.1300   | 0.3557         | 96 | 0.37    | 0.7156  | 0.9991 |
| SBA_250                                                                                    | SBA_SCN_BSR | 0.6350   | 0.3557         | 96 | 1.79    | 0.0774  | 0.4801 |
| SBA_250                                                                                    | SBA_UNL     | 2.1015   | 0.3557         | 96 | 5.91    | <.0001  | <.0001 |
| SBA_250                                                                                    | SCN         | 0.1085   | 0.3557         | 96 | 0.31    | 0.7610  | 0.9996 |
| SBA_SCN_BSR                                                                                | SBA_UNL     | 1.4665   | 0.3557         | 96 | 4.12    | <.0001  | 0.0011 |
| SBA_SCN_BSR                                                                                | SCN         | -0.5265  | 0.3557         | 96 | -1.48   | 0.1421  | 0.6776 |
| SBA_UNL                                                                                    | SCN         | -1.9930  | 0.3557         | 96 | -5.60   | <.0001  | <.0001 |

| Tukey Grouping for Treatment Least Squares Means (Alpha=0.05)  |          |   |
|----------------------------------------------------------------|----------|---|
| LS-means with the same letter are not significantly different. |          |   |
| Treatment                                                      | Estimate |   |
| CONTROL                                                        | 56.7095  | A |
|                                                                |          | A |
| SBA_250                                                        | 56.6880  | A |
|                                                                |          | A |
| BSR                                                            | 56.6000  | A |
|                                                                |          | A |
| SCN                                                            | 56.5795  | A |
|                                                                |          | A |
| SBA_SCN_BSR                                                    | 56.0530  | A |
|                                                                |          |   |
| SBA_UNL                                                        | 54.5865  | B |

**Seed Linolenic acid (18:3)**

| Type III Tests of Fixed Effects |        |        |         |        |
|---------------------------------|--------|--------|---------|--------|
| Effect                          | Num DF | Den DF | F Value | Pr > F |
| Year                            | 1      | 96     | 461.47  | <.0001 |
| Variety                         | 1      | 96     | 24.35   | <.0001 |
| Year*Variety                    | 1      | 96     | 3.18    | 0.0779 |
| Treatment                       | 5      | 96     | 9.42    | <.0001 |
| Year*Treatment                  | 5      | 96     | 0.75    | 0.5897 |
| Variety*Treatment               | 5      | 96     | 0.75    | 0.5855 |
| Year*Variety*Treatme            | 5      | 96     | 0.57    | 0.7219 |

| Differences of Treatment Least Squares Means<br>Adjustment for Multiple Comparisons: Tukey |             |          |                |    |         |         |        |
|--------------------------------------------------------------------------------------------|-------------|----------|----------------|----|---------|---------|--------|
| Treatment                                                                                  | Treatment   | Estimate | Standard Error | DF | t Value | Pr >  t | Adj P  |
| BSR                                                                                        | CONTROL     | -0.1165  | 0.1569         | 96 | -0.74   | 0.4597  | 0.9761 |
| BSR                                                                                        | SBA_250     | -0.1205  | 0.1569         | 96 | -0.77   | 0.4445  | 0.9722 |
| BSR                                                                                        | SBA_SCN_BSR | 0.5205   | 0.1569         | 96 | 3.32    | 0.0013  | 0.0158 |
| BSR                                                                                        | SBA_UNL     | 0.6110   | 0.1569         | 96 | 3.89    | 0.0002  | 0.0025 |
| BSR                                                                                        | SCN         | -0.1060  | 0.1569         | 96 | -0.68   | 0.5010  | 0.9843 |
| CONTROL                                                                                    | SBA_250     | -0.00400 | 0.1569         | 96 | -0.03   | 0.9797  | 1.0000 |
| CONTROL                                                                                    | SBA_SCN_BSR | 0.6370   | 0.1569         | 96 | 4.06    | 0.0001  | 0.0014 |
| CONTROL                                                                                    | SBA_UNL     | 0.7275   | 0.1569         | 96 | 4.64    | <.0001  | 0.0002 |
| CONTROL                                                                                    | SCN         | 0.01050  | 0.1569         | 96 | 0.07    | 0.9468  | 1.0000 |
| SBA_250                                                                                    | SBA_SCN_BSR | 0.6410   | 0.1569         | 96 | 4.08    | <.0001  | 0.0013 |
| SBA_250                                                                                    | SBA_UNL     | 0.7315   | 0.1569         | 96 | 4.66    | <.0001  | 0.0001 |
| SBA_250                                                                                    | SCN         | 0.01450  | 0.1569         | 96 | 0.09    | 0.9266  | 1.0000 |
| SBA_SCN_BSR                                                                                | SBA_UNL     | 0.09050  | 0.1569         | 96 | 0.58    | 0.5655  | 0.9923 |
| SBA_SCN_BSR                                                                                | SCN         | -0.6265  | 0.1569         | 96 | -3.99   | 0.0001  | 0.0017 |
| SBA_UNL                                                                                    | SCN         | -0.7170  | 0.1569         | 96 | -4.57   | <.0001  | 0.0002 |

| Tukey Grouping for Treatment Least Squares Means (Alpha=0.05)  |          |   |
|----------------------------------------------------------------|----------|---|
| LS-means with the same letter are not significantly different. |          |   |
| Treatment                                                      | Estimate |   |
| SBA_250                                                        | 8.3180   | A |
|                                                                |          | A |
| CONTROL                                                        | 8.3140   | A |
|                                                                |          | A |
| SCN                                                            | 8.3035   | A |
|                                                                |          | A |
| BSR                                                            | 8.1975   | A |
|                                                                |          |   |
| SBA_SCN_BSR                                                    | 7.6770   | B |
|                                                                |          | B |
| SBA_UNL                                                        | 7.5865   | B |
